# Supplementary material for: Mito-nuclear coevolution and phylogenetic artifacts: the case of bivalve mollusks
Source: Springer Nature journal article supplement (doi:10.1038/s41598-022-15076-y), 2022-06-30
Supplement: MOESM1 [file 41598_2022_15076_MOESM1_ESM.pdf]

## Supplementary materials

| Dataset    | Matrix<br>completeness | Length masked<br>datasets (aa) | Discarded sites |
|------------|------------------------|--------------------------------|-----------------|
| mt-OXPPOS  | 95.46%                 | 2,760                          | 26.56%          |
| nu-OXPPOS  | 72.36%                 | 11,760                         | 37.35%          |
| sncRNAs    | 88.71%                 | 3,944                          | 72.71%          |
| glycolysis | 54.00%                 | 15,852                         | 40.93%          |

**Table S1.** Completeness and length of the four datasets. The completeness is the number of sequences of each dataset over the number of hypothetical sequences if each marker would have had a sequence for every OUT. The percentage of discarded sites refers to the sites removed during the masking step.

**a**

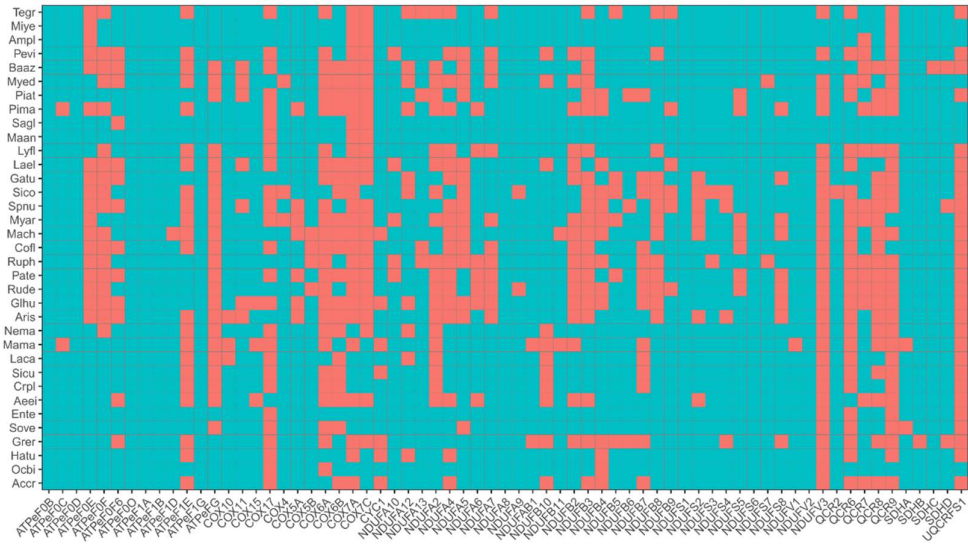

**b**

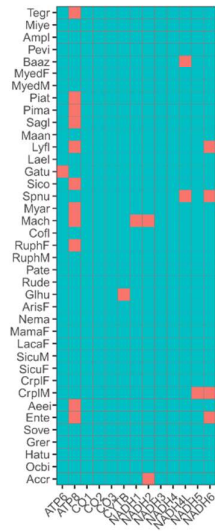

**c**

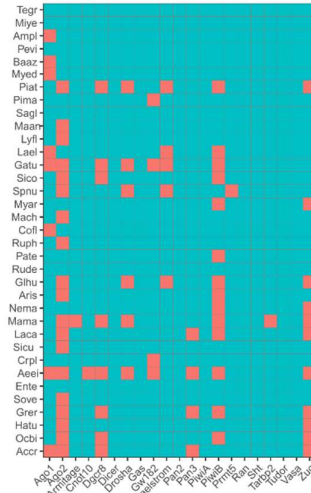

**d**

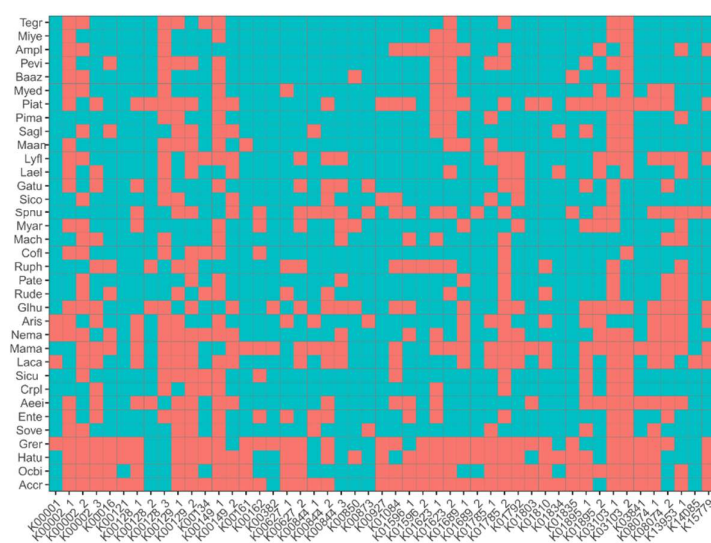

**Figure S1.** Presence and absence table of each marker in each OTU. On the y-axis the OTUs are shown: each label is abbreviated using the first two letters of the generic name and the first two letters of the specific epithet; F and M are used to distinguish female-type and male-type haplotypes. On the x-axis the markers used in the phylogenetic analysis are shown. Squares are colored in light blue, when the marker is present, or in red, when the marker is absent. (A) The nuclear OXPHOS markers' presence-absence table; (B) the mitochondrial OXPHOS markers' presence-absence table; (C) the sncRNA markers' presence-absence table; (D) the glycolysis markers' presence-absence table (see Table S7).

| Dataset              | Pipeline            | best tree lnL  | $\Delta$ lnL | SD        | P-value |
|----------------------|---------------------|----------------|--------------|-----------|---------|
| mitochondrial OXPHOS | RAxML               | -124,547.30695 |              |           |         |
|                      | IQ-TREE partitioned |                | -3.36015     | 11.17877  | > 0.05  |
|                      | IQ-TREE mixture     |                | -10.40756    | 15.82649  | > 0.05  |
|                      | MrBayes             |                | -10.35857    | 15.85253  | > 0.05  |
| nuclear OXPHOS       | RAxML               |                | -0.680621    | 16.37446  | > 0.05  |
|                      | IQ-TREE partitioned |                | -2.072105    | 17.540151 | > 0.05  |
|                      | IQ-TREE mixture     | -303,787.7888  |              |           |         |
|                      | MrBayes             |                | -2.944056    | 24.151885 | > 0.05  |
| sncRNA               | RAxML               | -98,413.79378  |              |           |         |
|                      | IQ-TREE partitioned |                | -11.724517   | 43.570374 | > 0.05  |
|                      | IQ-TREE mixture     |                | -9.772834    | 45.200477 | > 0.05  |
|                      | MrBayes             |                | -1.902815    | 12.893494 | > 0.05  |
| glycolysis           | RAxML               |                | -0.000002    | 0.003007  | > 0.05  |
|                      | IQ-TREE partitioned |                | -0.000001    | 0.003283  | > 0.05  |
|                      | IQ-TREE mixture     |                | -0.000001    | 0.003283  | > 0.05  |
|                      | MrBayes             | -282,343.47273 |              |           |         |

**Table S2.** Results of the Shimodaira-Hasegawa test computed between trees inferred from the same dataset but with different phylogenetic pipelines. For each dataset it is reported the log-likelihood of the maximum-likelihood tree (best tree lnL); the difference between the log-likelihood of each tree and the maximum-likelihood tree ( $\Delta$ lnL); the standard deviation (SD); the P-value.

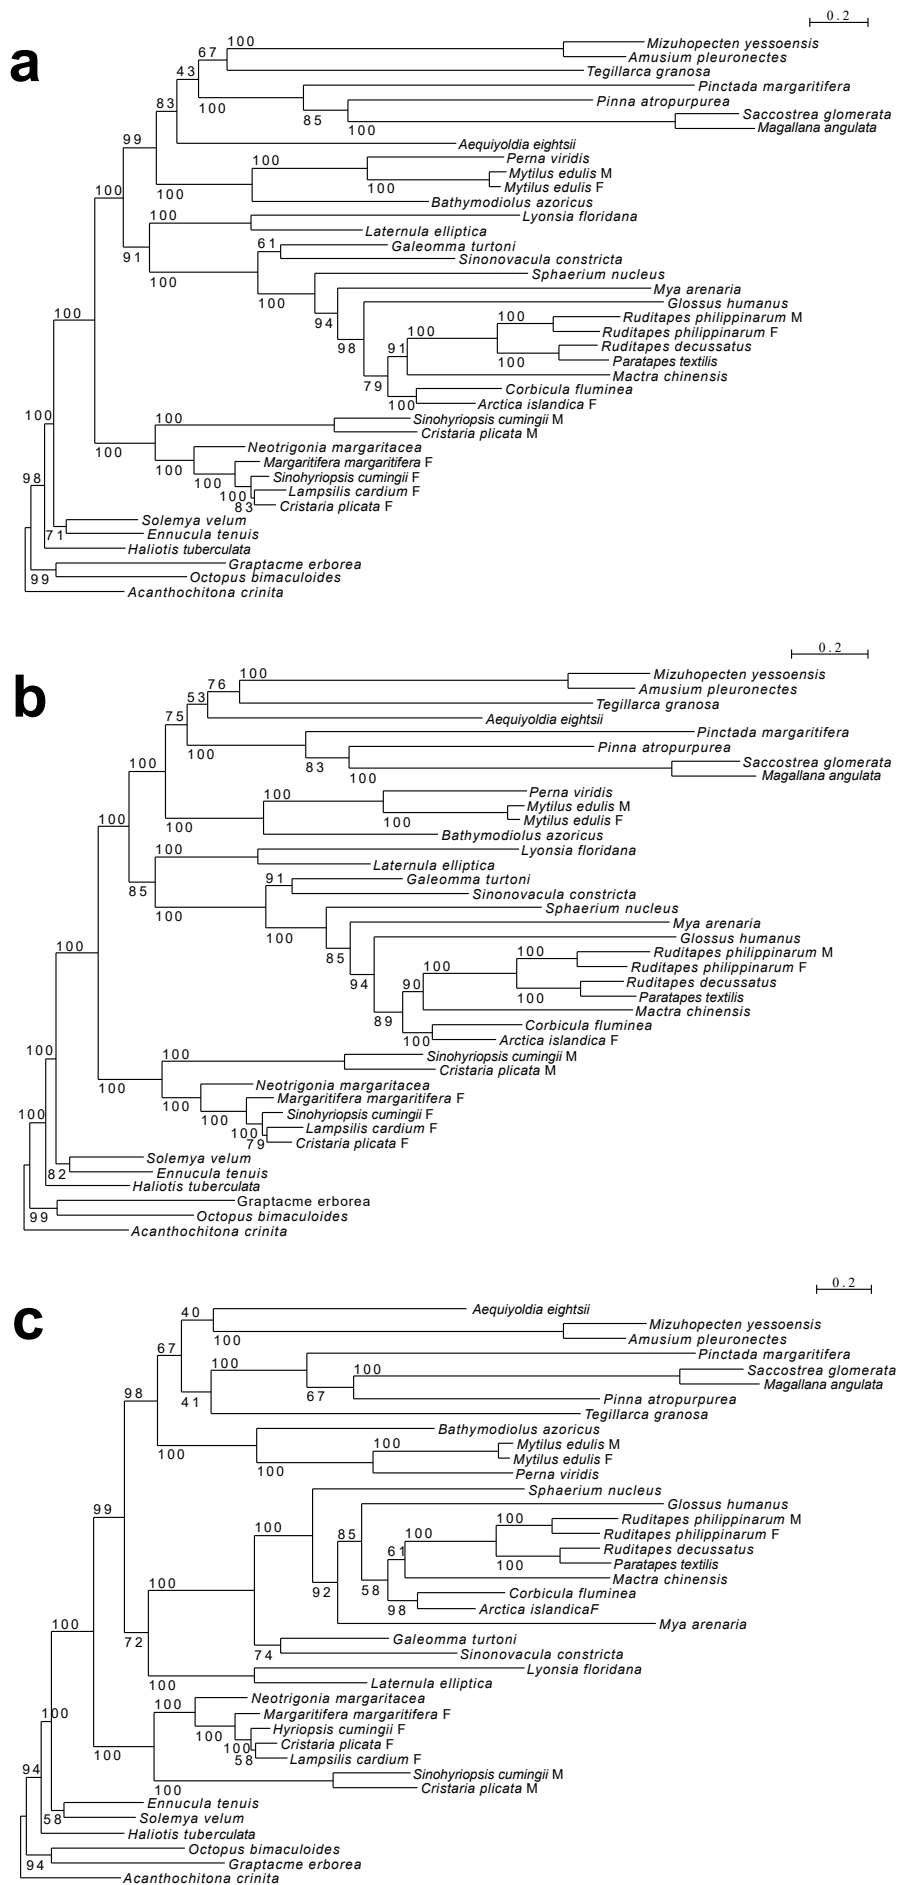

**Figure S2.** Trees inferred from the mitochondrial OXPPOS dataset. Each tree was obtained through a different phylogenetic pipeline (A) IQTREE partitioning the dataset, node support expressed as UFBoot value; (B) IQTREE with mixture model, node support expressed as UFBoot value; (C) RAXML, node support expressed as bootstrap value.

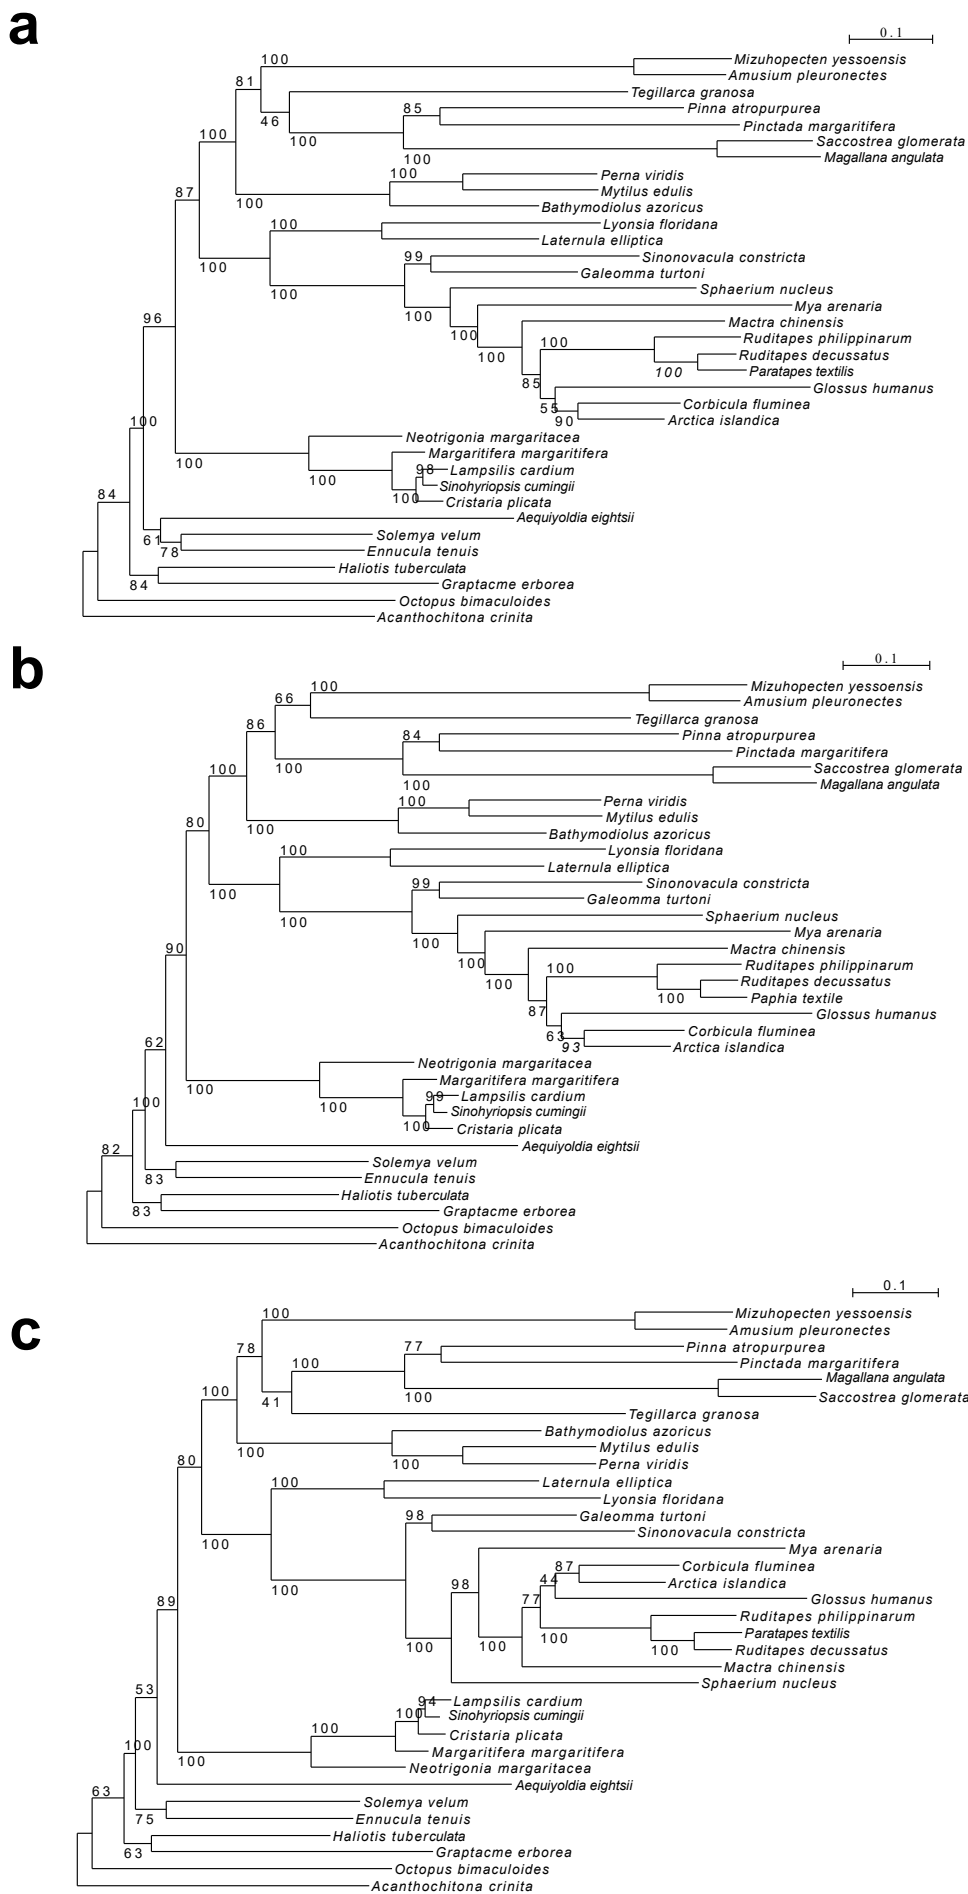

**Figure S3.** Trees inferred from the nuclear OXPPOS dataset. Each tree was obtained through a different phylogenetic pipeline (A) IQTREE partitioning the dataset, node support expressed as UFBoot value; (B) IQTREE with mixture model, node support expressed as UFBoot value; (C) RAxML, node support expressed as bootstrap value.

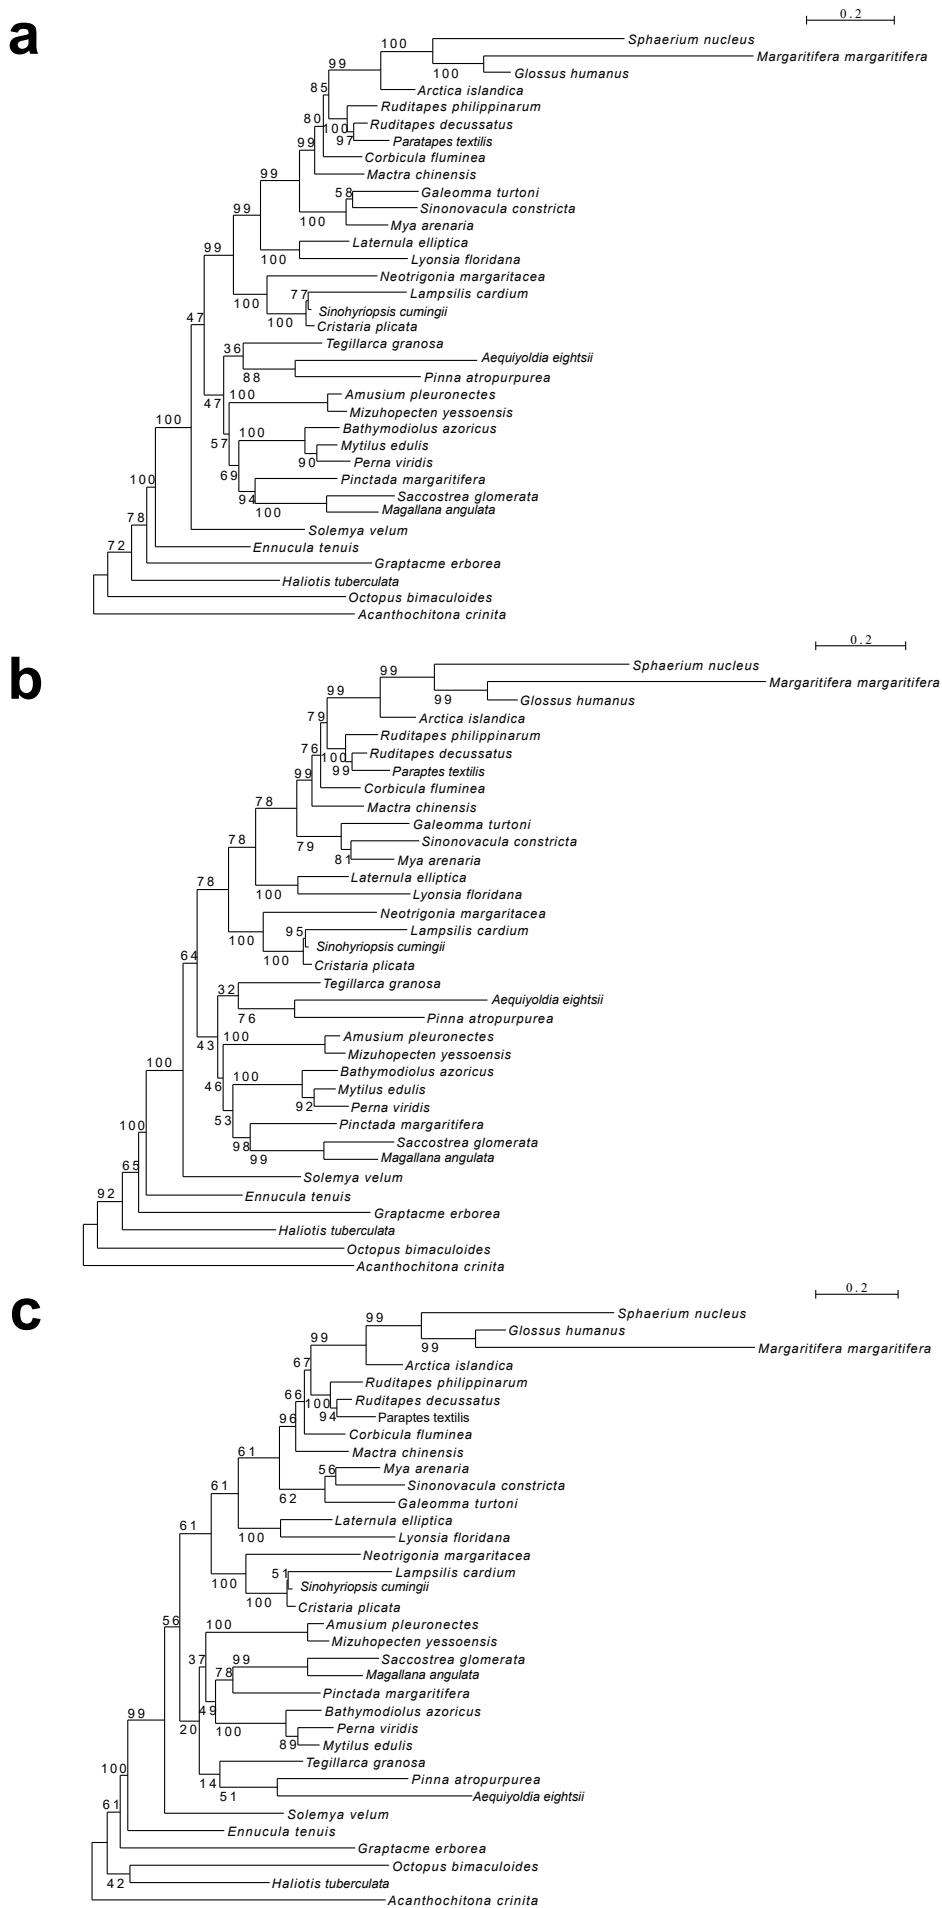

**Figure S4.** Trees inferred from the sncRNAs dataset. Each tree was obtained through a different phylogenetic pipeline (A) IQTREE partitioning the dataset, node support expressed as UFBoot value; (B) IQTREE with mixture model, node support expressed as UFBoot value; (C) RAxML, node support expressed as bootstrap value.

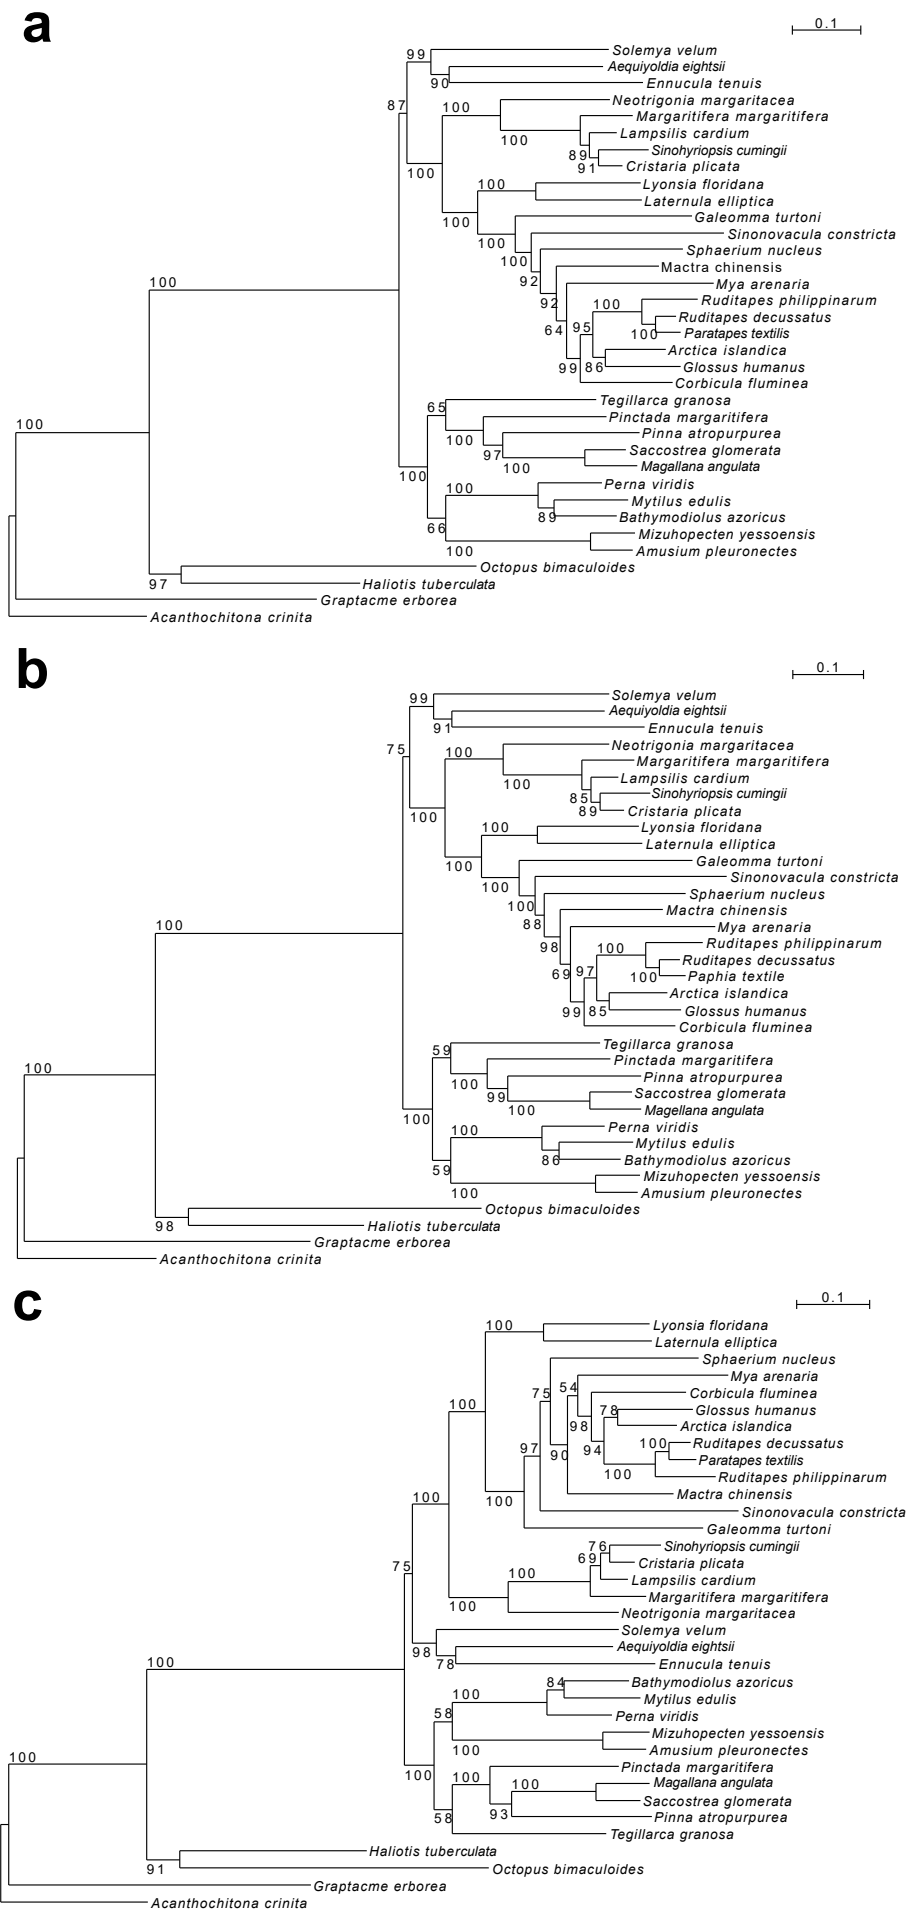

**Figure S5.** Trees inferred from the glycolysis dataset. Each tree was obtained through a different phylogenetic pipeline (A) IQTREE partitioning the dataset, node support expressed as UFBoot value; (B) IQTREE with mixture model, node support expressed as UFBoot value; (C) RAXML, node support expressed as bootstrap value.

| Dataset    | Sum $\Delta$ SLS | Average $\Delta$ SLS | % $\Delta$ SLSs > 0.5 <sup>c</sup> | % $\Delta$ SLSs < -0.5 <sup>d</sup> | mt-UFBboot | nuc-UFBboot | mt-gCF | nuc-gCF | mt-sCF | nuc-sCF |
|------------|------------------|----------------------|------------------------------------|-------------------------------------|------------|-------------|--------|---------|--------|---------|
| sncRNAs    | -308.6           | -0.079               | 7.76%                              | 11.24%                              | 0          | 99          | 0      | 27.8    | 28.9   | 46.8    |
| glycolysis | -338.8           | -0.021               | 0.69%                              | 2.26%                               | 0          | 100         | 5.0    | 32.5    | 31.1   | 41.2    |

**Table S3.**  $\Delta$ SLSs, UFBoots and CFs calculated on the sncRNAs and glycolysis datasets for the mt and nuc-topology.

|                  | <i>Acanthochitona avicula</i> * | <i>Haliotis tuberculata</i> | <i>Octopus bimaculoides</i> | <i>Graptacme eborea</i> | <i>Solemya velum</i> |
|------------------|---------------------------------|-----------------------------|-----------------------------|-------------------------|----------------------|
| reference genome | NC_047426                       | NC_013708                   | NC_029723                   | NC_006162               | NC_017612            |
| <i>atp6</i>      |                                 |                             |                             |                         |                      |
| <i>atp8</i>      |                                 |                             |                             |                         |                      |
| <i>co1</i>       |                                 |                             |                             |                         |                      |
| <i>co2</i>       |                                 |                             |                             |                         |                      |
| <i>co3</i>       |                                 |                             |                             |                         |                      |
| <i>cytb</i>      |                                 |                             |                             |                         |                      |
| <i>nadh1</i>     |                                 |                             |                             |                         |                      |
| <i>nadh2</i>     |                                 |                             |                             |                         |                      |
| <i>nadh3</i>     |                                 |                             |                             |                         |                      |
| <i>nadh4</i>     |                                 |                             |                             |                         |                      |
| <i>nadh4l</i>    |                                 |                             |                             |                         |                      |
| <i>nadh5</i>     |                                 |                             |                             |                         |                      |
| <i>nadh6</i>     |                                 |                             |                             |                         |                      |

**Table S4.** Mitochondrial genes localization in outgroups and Protobranchia OTUs. For each OTU it is reported the genes that are located on the G+T rich strand (in red) and the genes on the G+T poor strand (in blue) according to the reference mitochondrial genomes. Since no mitochondrial genome of *A. crinita* is available on NCBI, in this table we used the *A. avicula* mitochondrial reference genome. *Yoldia eightsii* and *Ennucula tenuis* are excluded from the table since no mitochondrial genome for these species or congeneric species has been annotated yet.



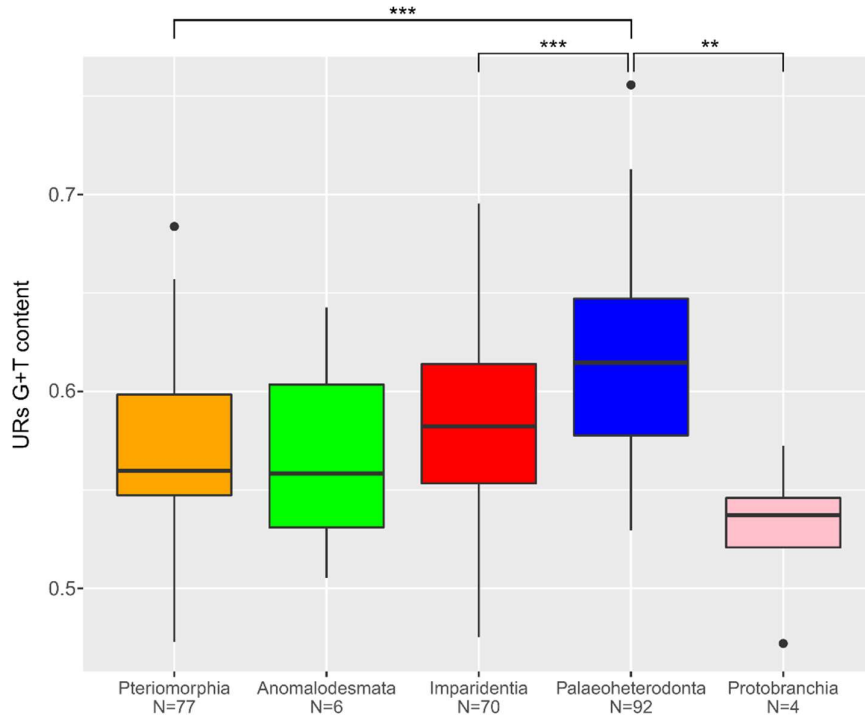

**Figure S6.** Boxplot comparing the mitochondrial unassigned regions G + T content between the five main Bivalvia clades. \*\*,  $0.01 > p\text{-value} \geq 0.001$  and \*\*\*,  $p\text{-value} < 0.001$ . The significance of the comparisons was calculated through the Kruskal and Wallis test, followed by the Dunn's test with Bonferroni's correction. The number of entries for each group is reported right below the clade label.

| markers        | G+T content | AT skew      | GC skew     |
|----------------|-------------|--------------|-------------|
| <i>atp6</i>    | 0.67085     | -0.365079365 | 0.286384977 |
| <i>atp8</i>    |             |              |             |
| <i>co1</i>     | 0.62756     | -0.263736264 | 0.238596491 |
| <i>co2</i>     | 0.60705     | -0.174193548 | 0.282051282 |
| <i>co3</i>     | 0.65468     | -0.317431193 | 0.294117647 |
| <i>cytb</i>    | 0.64876     | -0.298636927 | 0.295081967 |
| <i>nadh1</i>   | 0.65680     | -0.31629393  | 0.307692308 |
| <i>nadh2</i>   | 0.67647     | -0.347945205 | 0.365517241 |
| <i>nadh3</i>   | 0.73446     | -0.477911647 | 0.447619048 |
| <i>nadh4</i>   | 0.65303     | -0.216216216 | 0.295566502 |
| <i>naadh4l</i> | 0.63836     | -0.310722101 | 0.416666667 |
| <i>nadh5</i>   | 0.65901     | -0.322357019 | 0.308823529 |
| <i>nadh6</i>   | 0.68659     | -0.328165375 | 0.478787879 |

**Table S5.** *Yoldia eightsii* markers nucleotide composition. The table reports the G+T content, the AT skew and the GC skew calculated on the *Y. eightsii* mitochondrial markers. *atp8* gene is missing.

| Accession number | Species                          | Marker           | Source database |
|------------------|----------------------------------|------------------|-----------------|
| O74957           | <i>Homo sapiens</i>              | <i>ago-01</i>    | SwissProt       |
| Q8CJG1           | <i>Mus musculus</i>              | <i>ago-01</i>    | SwissProt       |
| Q27IR0           | <i>Drosophila melanogaster</i>   | <i>ago-01</i>    | SwissProt       |
| K4I6K9           | <i>Danio rerio</i>               | <i>ago-01</i>    | SwissProt       |
| F1MXX2           | <i>Bos taurus</i>                | <i>ago-01</i>    | SwissProt       |
| Q6QME8           | <i>Bos taurus</i>                | <i>ago-02</i>    | SwissProt       |
| Q9VUQ5           | <i>Drosophila melanogaster</i>   | <i>ago-02</i>    | SwissProt       |
| Q9UKV8           | <i>Homo sapiens</i>              | <i>ago-02</i>    | SwissProt       |
| Q8CJG0           | <i>Mus musculus</i>              | <i>ago-02</i>    | SwissProt       |
| K4I874           | <i>Danio rerio</i>               | <i>ago-02</i>    | SwissProt       |
| A0A0U1RML6       | <i>Caenorhabditis elegans</i>    | <i>ago-02</i>    | SwissProt       |
| Q9H9G7           | <i>Homo sapiens</i>              | <i>ago-03</i>    | SwissProt       |
| A9ZSZ2           | <i>Bombyx mori</i>               | <i>ago-03</i>    | SwissProt       |
| Q7PLK0           | <i>Drosophila melanogaster</i>   | <i>ago-03</i>    | SwissProt       |
| Q8CJF9           | <i>Mus musculus</i>              | <i>ago-03</i>    | SwissProt       |
| F1MG44           | <i>Bos taurus</i>                | <i>ago-03</i>    | SwissProt       |
| Q9HCK5           | <i>Homo sapiens</i>              | <i>ago-04</i>    | SwissProt       |
| Q8CJF8           | <i>Mus musculus</i>              | <i>ago-04</i>    | SwissProt       |
| K4IAH1           | <i>Danio rerio</i>               | <i>ago-04</i>    | SwissProt       |
| Q6J5K9           | <i>Drosophila melanogaster</i>   | <i>armitage</i>  | SwissProt       |
| Q9HCE1           | <i>Homo sapiens</i>              | <i>armitage</i>  | SwissProt       |
| O76922           | <i>Drosophila melanogaster</i>   | <i>aubergine</i> | SwissProt       |
| Q9V3G6           | <i>Drosophila melanogaster</i>   | <i>cnot10</i>    | SwissProt       |
| Q9H9A5           | <i>Homo sapiens</i>              | <i>cnot10</i>    | SwissProt       |
| A4IFB6           | <i>Bos taurus</i>                | <i>cnot10</i>    | SwissProt       |
| Q8BH15           | <i>Mus musculus</i>              | <i>cnot10</i>    | SwissProt       |
| KT694356.1       | <i>Mytilus galloprovincialis</i> | <i>cnot10</i>    | NCBI            |
| Q08CL8           | <i>Danio rerio</i>               | <i>cnot10</i>    | SwissProt       |
| Q8WYQ5           | <i>Homo sapiens</i>              | <i>dgcr8</i>     | SwissProt       |
| Q8BH15           | <i>Mus musculus</i>              | <i>dgcr8</i>     | SwissProt       |
| A6QR44           | <i>Bos taurus</i>                | <i>dgcr8</i>     | SwissProt       |
| A2BEG3           | <i>Danio rerio</i>               | <i>dgcr8</i>     | SwissProt       |
| A0A210R4Q5       | <i>Mizuhopecten yessoenensis</i> | <i>dgcr8</i>     | SwissProt       |
| KT447252.1       | <i>Mytilus galloprovincialis</i> | <i>dgcr8</i>     | NCBI            |
| Q9VCU9           | <i>Drosophila melanogaster</i>   | <i>dicer</i>     | SwissProt       |
| Q6TV19           | <i>Danio rerio</i>               | <i>dicer</i>     | SwissProt       |
| Q6TUI4           | <i>Bos taurus</i>                | <i>dicer</i>     | SwissProt       |
| Q8R418           | <i>Mus musculus</i>              | <i>dicer</i>     | SwissProt       |
| A0A0B7C3X8       | <i>Arion vulgaris</i>            | <i>dicer</i>     | SwissProt       |
| A0A210QXA0       | <i>Mizuhopecten yessoenensis</i> | <i>dicer</i>     | SwissProt       |
| KT447258.1       | <i>Mytilus galloprovincialis</i> | <i>dicer</i>     | NCBI            |
| Q9NRR4           | <i>Homo sapiens</i>              | <i>drosha</i>    | SwissProt       |
| Q5HZJ0           | <i>Mus musculus</i>              | <i>drosha</i>    | SwissProt       |
| 21349627.1       | <i>Mizuhopecten yessoenensis</i> | <i>drosha</i>    | NCBI            |
| KT447251.1       | <i>Mytilus galloprovincialis</i> | <i>drosha</i>    | NCBI            |
| Q8WWH4           | <i>Homo sapiens</i>              | <i>gasz</i>      | SwissProt       |
| Q8VD46           | <i>Mus musculus</i>              | <i>gasz</i>      | SwissProt       |

|            |                                  |           |           |
|------------|----------------------------------|-----------|-----------|
| Q8WMX6     | <i>Pan troglodytes</i>           | gasz      | SwissProt |
| Q8WMX8     | <i>Bos taurus</i>                | gasz      | SwissProt |
| 13095931.1 | <i>Biomphalaria glabrata</i>     | gasz      | NCBI      |
| 21362591.1 | <i>Mizuhopecten yessoenensis</i> | gasz      | NCBI      |
| 19927737.1 | <i>Crassostrea gigas</i>         | gasz      | NCBI      |
| 4927861.1  | <i>Bombyx mori</i>               | gasz      | NCBI      |
| Q8SY33     | <i>Drosophila melanogaster</i>   | gw182     | SwissProt |
| Q17740     | <i>Caenorhabditis elegans</i>    | gw182     | SwissProt |
| Q9VNS0     | <i>Drosophila melanogaster</i>   | maelstrom | SwissProt |
| Q8BVN9     | <i>Mus musculus</i>              | maelstrom | SwissProt |
| Q96JY0     | <i>Homo sapiens</i>              | maelstrom | SwissProt |
| 21362591.1 | <i>Mizuhopecten yessoenensis</i> | maelstrom | NCBI      |
| KT694366.1 | <i>Mytilus galloprovincialis</i> | maelstrom | NCBI      |
| Q504Q3     | <i>Homo sapiens</i>              | pan2      | SwissProt |
| Q8BGF7     | <i>Mus musculus</i>              | pan2      | SwissProt |
| 21376239.1 | <i>Mizuhopecten yessoenensis</i> | pan2      | NCBI      |
| KT694367.1 | <i>Mytilus galloprovincialis</i> | pan2      | NCBI      |
| H3BKF3     | <i>Mus musculus</i>              | pan3      | SwissProt |
| K1QVJ8     | <i>Crassostrea gigas</i>         | pan3      | SwissProt |
| E7EXP6     | <i>Danio rerio</i>               | pan3      | SwissProt |
| 21364101.1 | <i>Mizuhopecten yessoenensis</i> | pan3      | NCBI      |
| 13064656.1 | <i>Biomphalaria glabrata</i>     | pan3      | NCBI      |
| Q8UVX0     | <i>Danio rerio</i>               | piwia     | SwissProt |
| P22893     | <i>Mus musculus</i>              | piwia     | SwissProt |
| Q9VKM1     | <i>Drosophila melanogaster</i>   | piwia     | SwissProt |
| O61931     | <i>Caenorhabditis elegans</i>    | piwia     | SwissProt |
| Q96J94     | <i>Homo sapiens</i>              | piwia     | SwissProt |
| A8D8P8     | <i>Bombyx mori</i>               | piwia     | SwissProt |
| K1QVJ8     | <i>Crassostrea gigas</i>         | piwia     | SwissProt |
| A0A210PYP0 | <i>Mytilus galloprovincialis</i> | piwia     | SwissProt |
| E1B7E6     | <i>Bos taurus</i>                | piwia     | SwissProt |
| D9I023     | <i>Crepidula fornicata</i>       | piwia     | SwissProt |
| KT447255.1 | <i>Mytilus galloprovincialis</i> | piwia     | NCBI      |
| A0A2C9JYQ3 | <i>Biomphalaria glabrata</i>     | piwia     | SwissProt |
| A0A0P0M0F9 | <i>Azumapecten ferreri</i>       | piwia     | SwissProt |
| Q8CDG1     | <i>Mus musculus</i>              | piwib     | SwissProt |
| A2CEI6     | <i>Danio rerio</i>               | piwib     | SwissProt |
| Q8TC59     | <i>Homo sapiens</i>              | piwib     | SwissProt |
| A0A210Q0Y2 | <i>Mytilus galloprovincialis</i> | piwib     | SwissProt |
| K1QKA9     | <i>Crassostrea gigas</i>         | piwib     | SwissProt |
| KT447256.1 | <i>Mytilus galloprovincialis</i> | piwib     | NCBI      |
| O14744     | <i>Homo sapiens</i>              | prmt5     | SwissProt |
| P46580     | <i>Caenorhabditis elegans</i>    | prmt5     | SwissProt |
| Q9U6Y9     | <i>Drosophila melanogaster</i>   | prmt5     | SwissProt |
| Q8CIG8     | <i>Mus musculus</i>              | prmt5     | SwissProt |
| B0R026     | <i>Danio rerio</i>               | prmt5     | SwissProt |
| A0A210PE51 | <i>Mizuhopecten yessoenensis</i> | prmt5     | SwissProt |
| 11420415.1 | <i>Crassostrea gigas</i>         | prmt5     | NCBI      |
| 13084844.1 | <i>Biomphalaria glabrata</i>     | prmt5     | NCBI      |

|            |                                  |                 |           |
|------------|----------------------------------|-----------------|-----------|
| P62826     | <i>Homo sapiens</i>              | <i>ran</i>      | SwissProt |
| P62827     | <i>Mus musculus</i>              | <i>ran</i>      | SwissProt |
| Q9VZ23     | <i>Drosophila melanogaster</i>   | <i>ran</i>      | SwissProt |
| 11426860.1 | <i>Crassostrea gigas</i>         | <i>ran</i>      | NCBI      |
| 13094746.1 | <i>Biomphalaria glabrata</i>     | <i>ran</i>      | NCBI      |
| KT447254.1 | <i>Mytilus galloprovincialis</i> | <i>ran</i>      | NCBI      |
| Q9W119     | <i>Drosophila melanogaster</i>   | <i>shutdown</i> | SwissProt |
| 21353947.1 | <i>Mizuhopecten yessoenensis</i> | <i>shutdown</i> | NCBI      |
| 13077159.1 | <i>Biomphalaria glabrata</i>     | <i>shutdown</i> | NCBI      |
| Q7SXR1     | <i>Danio rerio</i>               | <i>tarbp2</i>   | SwissProt |
| Q15633     | <i>Homo sapiens</i>              | <i>tarbp2</i>   | SwissProt |
| Q0IIG6     | <i>Bos taurus</i>                | <i>tarbp2</i>   | SwissProt |
| 21375211.1 | <i>Mizuhopecten yessoenensis</i> | <i>tarbp2</i>   | NCBI      |
| KT447253.1 | <i>Mytilus galloprovincialis</i> | <i>tarbp2</i>   | NCBI      |
| P22893     | <i>Mus musculus</i>              | <i>tudor</i>    | SwissProt |
| Q58EK5     | <i>Danio rerio</i>               | <i>tudor</i>    | SwissProt |
| Q9BXT4     | <i>Homo sapiens</i>              | <i>tudor</i>    | SwissProt |
| H9JD76     | <i>Bombyx mori</i>               | <i>tudor</i>    | SwissProt |
| W5VJD8     | <i>Biomphalaria glabrata</i>     | <i>tudor</i>    | SwissProt |
| K1R3H4     | <i>Crassostrea gigas</i>         | <i>tudor</i>    | SwissProt |
| A0A210PGL2 | <i>Mytilus galloprovincialis</i> | <i>tudor</i>    | SwissProt |
| A0A126Q9D5 | <i>Mytilus galloprovincialis</i> | <i>tudor</i>    | SwissProt |
| Q8T0F1     | <i>Drosophila melanogaster</i>   | <i>tudor</i>    | SwissProt |
| Q9NQI0     | <i>Homo sapiens</i>              | <i>vasa</i>     | SwissProt |
| 11437246.1 | <i>Crassostrea gigas</i>         | <i>vasa</i>     | NCBI      |
| 21370695.1 | <i>Mizuhopecten yessoenensis</i> | <i>vasa</i>     | NCBI      |
| Q9VKD7     | <i>Drosophila melanogaster</i>   | <i>zuc</i>      | SwissProt |
| 11428483.1 | <i>Crassostrea gigas</i>         | <i>zuc</i>      | NCBI      |
| 13063678.1 | <i>Biomphalaria glabrata</i>     | <i>zuc</i>      | NCBI      |
| 21352816.1 | <i>Mizuhopecten yessoenensis</i> | <i>zuc</i>      | NCBI      |

**Table S6.** List of entries included in the user-defined database for the annotation of transcripts related to the biogenesis of sncRNAs.

| Dataset        | Marker         | KEGG ID | Orthologous groups |
|----------------|----------------|---------|--------------------|
| nuclear OXPHOS | <i>atpef1A</i> | K02132  | 1                  |
|                | <i>atpef1B</i> | K02133  | 1                  |
|                | <i>atpef1G</i> | K02136  | 1                  |
|                | <i>atpef1D</i> | K02134  | 1                  |
|                | <i>atpef1E</i> | K02135  | 1                  |
|                | <i>atpef0B</i> | K02127  | 1                  |
|                | <i>atpef0C</i> | K02128  | 1                  |
|                | <i>atpef0D</i> | K02138  | 1                  |
|                | <i>atpef0E</i> | K02129  | 1                  |
|                | <i>atpef0F</i> | K02130  | 1                  |

|                  |        |   |
|------------------|--------|---|
| <i>atpef0F6</i>  | K02131 | 1 |
| <i>atpef0jFO</i> | K02137 | 1 |
| <i>atpefG</i>    | K02140 | 1 |
| <i>cox4</i>      | K02263 | 1 |
| <i>cox5a</i>     | K02264 | 1 |
| <i>cox5b</i>     | K02265 | 1 |
| <i>cox6a</i>     | K02266 | 1 |
| <i>cox6b</i>     | K02267 | 1 |
| <i>cox7a</i>     | K02270 | 1 |
| <i>cox7c</i>     | K02272 | 1 |
| <i>cox10</i>     | K02257 | 1 |
| <i>cox11</i>     | K02258 | 1 |
| <i>cox15</i>     | K02259 | 1 |
| <i>cox17</i>     | K02260 | 1 |
| <i>ndufa2</i>    | K03946 | 1 |
| <i>ndufa4</i>    | K03948 | 1 |
| <i>ndufa5</i>    | K03949 | 1 |
| <i>ndufa6</i>    | K03950 | 1 |
| <i>ndufa7</i>    | K03951 | 1 |
| <i>ndufa8</i>    | K03952 | 1 |
| <i>ndufa9</i>    | K03953 | 1 |
| <i>ndufa10</i>   | K03954 | 1 |
| <i>nudfa12</i>   | K11352 | 1 |
| <i>ndufa13</i>   | K11353 | 1 |
| <i>ndufb1</i>    | K03957 | 1 |
| <i>ndufb2</i>    | K03958 | 1 |
| <i>ndufb3</i>    | K03959 | 1 |
| <i>ndufb4</i>    | K03960 | 1 |
| <i>ndufb5</i>    | K03961 | 1 |
| <i>ndufb6</i>    | K03962 | 1 |
| <i>ndufb7</i>    | K03963 | 1 |
| <i>ndufb8</i>    | K03964 | 1 |
| <i>ndufb9</i>    | K03965 | 1 |
| <i>ndufb10</i>   | K03966 | 1 |
| <i>ndufb11</i>   | K11351 | 1 |
| <i>ndufs1</i>    | K03934 | 1 |
| <i>ndufs2</i>    | K03935 | 1 |
| <i>ndufs3</i>    | K03936 | 1 |
| <i>ndufs4</i>    | K03937 | 1 |
| <i>ndufs5</i>    | K03938 | 1 |
| <i>ndufs6</i>    | K03939 | 1 |
| <i>ndufs7</i>    | K03940 | 1 |
| <i>ndufs8</i>    | K03941 | 1 |
| <i>ndufv1</i>    | K03942 | 1 |
| <i>ndufv2</i>    | K03943 | 1 |
| <i>ndufv3</i>    | K03944 | 1 |
| <i>qcr2</i>      | K00415 | 1 |

|               |                  |        |   |
|---------------|------------------|--------|---|
|               | <i>qcr6</i>      | K00416 | 1 |
|               | <i>qcr7</i>      | K00417 | 1 |
|               | <i>qcr8</i>      | K00418 | 1 |
|               | <i>qcr9</i>      | K00419 | 1 |
|               | <i>cyc1</i>      | K00413 | 1 |
|               | <i>uqcrfs1</i>   | K00411 | 1 |
|               | <i>sdha</i>      | K00234 | 1 |
|               | <i>sdhb</i>      | K00235 | 1 |
|               | <i>sdhc</i>      | K00236 | 1 |
|               | <i>sdhd</i>      | K00237 | 1 |
| <hr/>         |                  |        |   |
| Mitochondrial | <i>atp6</i>      | K02126 | 1 |
| OXPPOS        | <i>atp8</i>      | K02125 | 1 |
|               | <i>co1</i>       | K02256 | 1 |
|               | <i>co2</i>       | K02261 | 1 |
|               | <i>co3</i>       | K02262 | 1 |
|               | <i>cytb</i>      | K00412 | 1 |
|               | <i>nadh1</i>     | K03878 | 1 |
|               | <i>nadh2</i>     | K03879 | 1 |
|               | <i>nadh3</i>     | K03880 | 1 |
|               | <i>nadh4</i>     | K03881 | 1 |
|               | <i>nadh4L</i>    | K03882 | 1 |
|               | <i>nadh5</i>     | K03883 | 1 |
|               | <i>nadh6</i>     | K03884 | 1 |
| <hr/>         |                  |        |   |
| sncRNA        | <i>ago-01</i>    | K11593 | 1 |
|               | <i>ago-02</i>    | K11593 | 1 |
|               | <i>armitage</i>  | K18432 | 1 |
|               | <i>cnot10</i>    | K12607 | 1 |
|               | <i>dgcr8</i>     | K18418 | 1 |
|               | <i>dicer</i>     | K11592 | 1 |
|               | <i>droscha</i>   | K03685 | 1 |
|               | <i>gasz</i>      | K18410 | 1 |
|               | <i>gw182</i>     | K18412 | 1 |
|               | <i>maelstrom</i> | K18411 | 1 |
|               | <i>pan2</i>      | K12571 | 1 |
|               | <i>pan3</i>      | K12572 | 1 |
|               | <i>piwiA</i>     | K02156 | 1 |
|               | <i>piwiB</i>     | K02156 | 1 |
|               | <i>prmt5</i>     | K02516 | 1 |
|               | <i>ran</i>       | K07936 | 1 |
|               | <i>sh1</i>       | K09571 | 1 |
|               | <i>tarbp2</i>    | K18420 | 1 |
|               | <i>tudor</i>     | K18407 | 1 |
|               | <i>vasa</i>      | K13982 | 1 |
|               | <i>zucchini</i>  | K16862 | 1 |
| <hr/>         |                  |        |   |
| partial-glyco | <i>adh</i>       | K00001 | 1 |

|             |                  |               |   |
|-------------|------------------|---------------|---|
|             | <i>ldh</i>       | K00016        | 1 |
|             | <i>adhC</i>      | K00121        | 1 |
|             | <i>pdhA</i>      | K00161        | 1 |
|             | <i>pdhB</i>      | K00162        | 1 |
|             | <i>pdhD</i>      | K00382        | 1 |
|             | <i>pyk</i>       | K00850        | 1 |
|             | <i>pgk</i>       | K00927        | 1 |
|             | <i>g6pc</i>      | K01084        | 1 |
|             | <i>E5.1.3.15</i> | K01792        | 1 |
|             | <i>tpiA</i>      | K01803        | 1 |
|             | <i>pgi</i>       | K01810        | 1 |
|             | <i>gpmA</i>      | K01834        | 1 |
|             | <i>pgm</i>       | K01835        | 1 |
|             | <i>fbp</i>       | <i>K03841</i> | 1 |
|             | <i>aldh741</i>   | K14085        | 1 |
|             | <i>pgm2</i>      | K15779        | 1 |
| <hr/>       |                  |               |   |
| total-glyco | <i>akr1a1</i>    | K00002        | 3 |
|             | <i>aldh</i>      | K00128        | 3 |
|             | <i>aldh3</i>     | K00129        | 1 |
|             | <i>aldh9a1</i>   | K00149        | 2 |
|             | <i>pdhc</i>      | K00627        | 2 |
|             | <i>hk</i>        | K00844        | 2 |
|             | <i>pckA</i>      | K01596        | 3 |
|             | <i>aldo</i>      | K01623        | 2 |
|             | <i>eno</i>       | K01689        | 2 |
|             | <i>galM</i>      | K01785        | 2 |
|             | <i>acs</i>       | K01895        | 2 |
|             | <i>minnp1</i>    | K03103        | 2 |
|             | <i>adpgk</i>     | K08074        | 2 |
|             | <i>adph</i>      | K13953        | 1 |

**Table S7.** List of entries included in the user-defined database for the annotation of transcripts related to the biogenesis of sncRNAs. For each markers is reported the number of clear monophyletic group detected, which are more than 1 only in the total-glyco dataset.
